# Supplementary material
Source: publisher site journal article supplement (https://static.cambridge.org/content/id/urn:cambridge.org:id:article:S0884291417002953/resource/name/SupplementaryInformation.docx)
Supplement: Supplementary file 1 [file SupplementaryInformation.docx]

**Supplementary Information**

**Hardening Mechanisms in Irradiated Cu-W Alloys**

Gowtham Sriram Jawaharram, Shen J. Dillon* and Robert S. Averback

Department of Materials Science and Engineering, University of Illinois Urbana-Champaign, Urbana, IL 61801

*Corresponding author. Phone (217) 244-5622; e-mail: sdillon@illinois.edu


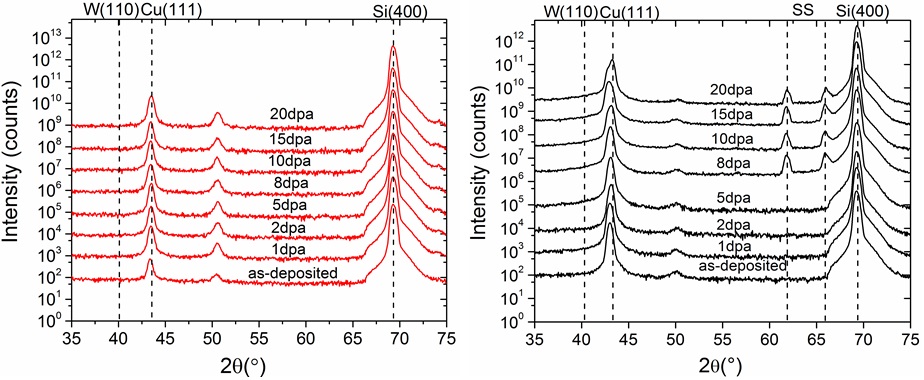


FIG. S1 XRD spectra of Cu99W1(red) and Cu94W6 (black) as a function of irradiation dose. Dotted lines correspond to the Bragg peaks of Cu (111), W (110), Stainless steels and Si (400) respectively. The additional peaks observed at 8, 10, 15 and 20 dpa are from stainless steel mounts used to mount these samples on the X-ray diffractometer.


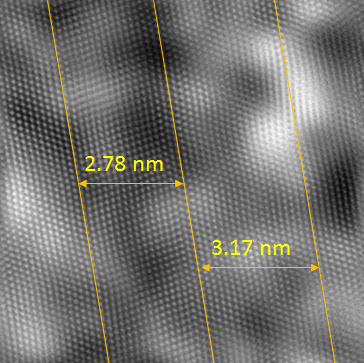


FIG. S2 High resolution HAADF image of Cu94W6 irradiated to 20dpa showing a twin spacing of approximately 2.9nm
